# Supplementary material
Source: Springer Nature journal article supplement (https://www.springermedizin.de/resource/supplementary/12884_2013_902_MOESM1_ESM.pdf/9459350)
Supplement: MOESM1 [file 9459350]

## Recruitment

All pregnant asthmatic women identified at antenatal booking visit (12-14 weeks gestation) are assessed for eligibility and consented into study

## Baseline assessment of asthma at 18 weeks

- Asthma history and assessment
- Asthma severity and control
- Spirometry

## Randomisation by telephone system

### Standard Care

Standard antenatal outpatient appointments with routine evaluation of asthma according to SA Perinatal Practice Guidelines

Assessment of asthma control by research midwife at 18, 24, 30 & 36 weeks gestation

### Antenatal Asthma Management Service

#### Initial Visit @ 18 weeks gestation

- Asthma education session
- Evaluation of asthma control and management
- Development of Asthma Action Plan
- Detailed asthma management report written

IF ACQ  $\leq$  1.5

IF ACQ  $>$  1.5

#### Referral to GP or respiratory physician

- No change in asthma therapy required
- Confirm Asthma Action Plan

#### Referral to GP or respiratory physician

- Assess appropriateness of step-up therapy
- Confirm Asthma Action Plan

#### Follow-up Visits @ 24, 30 & 36 weeks gestation

- Reinforcement of asthma knowledge
- Re-evaluation of asthma control and management
- Revision of Asthma Action Plan (If necessary)

IF ACQ  $\leq$  1.5

IF ACQ  $>$  1.5

#### No further referral required

- Follow Asthma Action Plan

#### Referral to GP or respiratory physician

- Assess appropriateness of step-up therapy
- Reassess Asthma Action Plan

## Delivery Outcomes Recorded

### Comparison of primary outcome:

- Asthma exacerbations

6 Month Follow-up of all children
